# Supplementary material
Source: PubMed Central journal article supplement (PMC4068504)

Supplementary figure S1. Comparison of the prevalence of *Lactobacillus* and *M. smithii* between controls and treated patients.

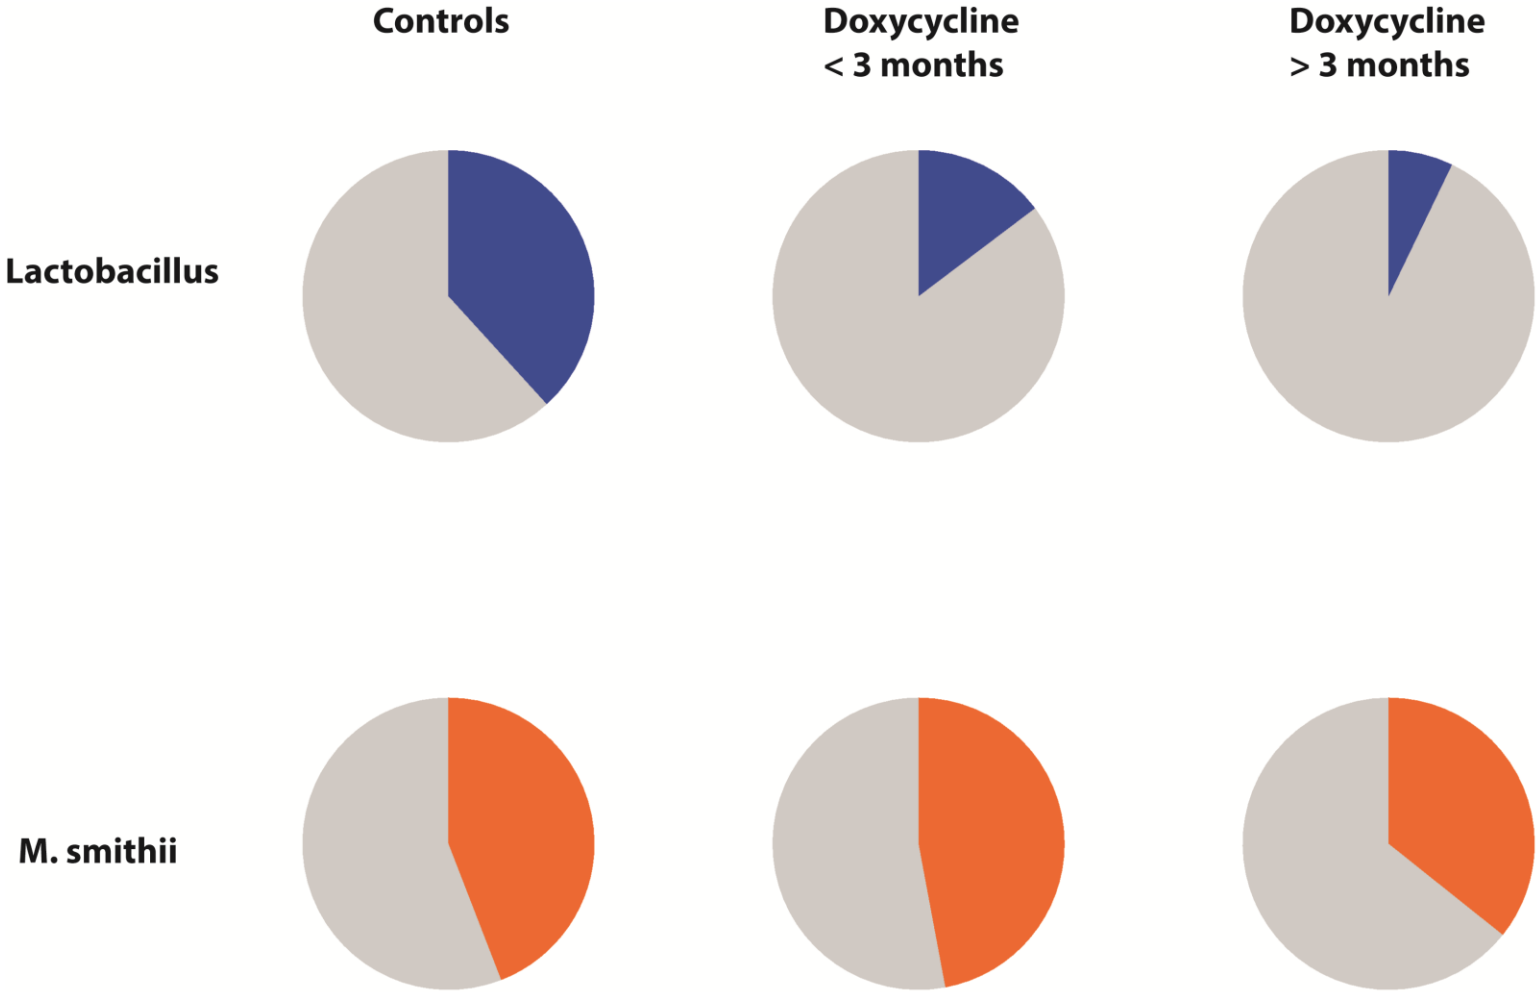

Supplement: AAC.02437-14_zac006142908so1.pdf [file AAC.02437-14_zac006142908so1.pdf]
